# Supplementary material for: Anti-inflammatory probiotics HF05 and HF06 synergistically alleviate ulcerative colitis and secondary liver injury
Source: Royal Society of Chemistry journal article supplement (doi:10.1039/d3fo04419j), 2024-01-01
Supplement: d3fo04419j1.pdf [file d3fo04419j1.pdf]

1 **Anti-inflammatory probiotics HF05 and HF06 synergistically alleviate ulcerative**  
2 **colitis and secondary liver injury**

3 Chunhong Liu<sup>a</sup>, Xiaofen Qi<sup>a</sup>, Xiaolin Liu<sup>a</sup>, Yue Sun<sup>a</sup>, Kaidong Mao<sup>b</sup>, Guiqi Shen<sup>b</sup>,

4 Ying Ma<sup>a, \*</sup>, Qingming Li<sup>c, d, \*</sup>

5

6 <sup>a</sup>Harbin Institute of Technology, Harbin, China

7 <sup>b</sup>Jiangsu HOWYOU Biotechnology Co., Ltd, Qidong, China

8 <sup>c</sup>New Hope Dairy Company Limited

9 <sup>d</sup>Sichuan Engineering Laboratory for High-quality Dairy Product Preparation and

10 Quality Control Technology

11

12 \*Corresponding author (Ying Ma, *email*: maying@hit.edu.cn; Qingming Li, *email*:

13 liqm@newhope.cn)

14

15

16

17

18

19

20

21

22

23

24

25

26 **SUPPORTING INFORMATION**

27 **Table S1.** Disease activity index parameters.

28 **Table S2.** RT -qPCR primer sequence.

29

30 **Table S1.** Disease activity index parameters.

| Score | Weight loss (%) | Stool consistency | Occult/gross bleeding |
|-------|-----------------|-------------------|-----------------------|
| 0     | None            | Normal            | Normal                |
| 1     | 1-5             | -                 | -                     |
| 2     | 5-10            | Loose stool       | Occult                |
| 3     | 10-20           | -                 | -                     |
| 4     | >20             | Diarrhea          | Gross bleeding        |

31

32

33

34

35

36

37

38

39

40

41

42

43 **Table S2.** RT -qPCR primer sequence.

| Gene             | Gene ID | F (5'-3')                  | R (5'-3')                  |
|------------------|---------|----------------------------|----------------------------|
| <i>β-actin</i>   | 11461   | GGACCTGACAGACTACCTCAT      | GCTCGAAGTCTAGAGCAACATAG    |
| <i>TNF-α</i>     | 21926   | AGCCACGTCGTAGCAAACCAC      | AGGTACAACCCATCGGCTGGCA     |
| <i>IL-6</i>      | 16193   | CTCCATCCAGTTGCCTTCT        | CTCCGACTTGTGAAGTGGTATAG    |
| <i>IL-1β</i>     | 16176   | AGTTGACGGACCCCAAAG         | CTTCTCCACAGCCACAATGA       |
| <i>IL-10</i>     | 16153   | CTTACTGACTGGCATGAGGATCA    | GCAGCTCTAGGAGCATGTGG       |
| <i>COX-2</i>     | 19225   | TGA GCA CAG GAT TTG ACC AG | CCT TGA AGT GGG TCA GGA TG |
| <i>NLRP3</i>     | 216799  | GTGGAGATCCTAGGTTTCTCTG     | CAGGATCTCATTCTCTTGGATC     |
| <i>ZO-1</i>      | 21872   | CTGATGGTGCTCTGCCTAAT       | TAGTCGCAAACCCACACTATC      |
| <i>occludin</i>  | 18260   | GAGCTTACAGGCAGAACTAGAC     | AGCAGCCATGTACTCTTCAC       |
| <i>Claudin-1</i> | 12737   | TTCTGGGAGGTGTCCTACTT       | AGGTGTTGGCTTGGGATAAG       |

44

45
